# Supplementary material
Source: PubMed Central journal article supplement (PMC3476846)
Supplement: NIHMS411129-supplement-01.pdf [file NIHMS411129-supplement-01.pdf]

554 **Supplemental Figures**

555 **Figure S1.** Framework genes showing the position of amplicons and the annealing sites of  
556 sequencing primers described in supplemental Table 1.

557 **Figure S2.** Neighbor-joining trees of *KIR3DL3* alleles. a) Relationships among alleles based on  
558 the nucleotide sequences of exons encoding the three extracellular domains. b) Relationships  
559 based on exons 7-9 encoding the transmembrane and cytoplasmic tail. Diamonds following the  
560 allele names identify alleles characterized in this study.

561 **Figure S3** Neighbor-joining tree of *KIR2DL4* alleles based on the nucleotide coding sequence of  
562 the gene. Diamonds following the allele names identify alleles characterized in this study.

563 **Figure S4.** Neighbor-joining tree of *KIR3DL2* alleles based on the nucleotide coding sequence  
564 of the gene. Diamonds following the allele names identify alleles characterized in this study.

**Supplementary Table 1. Framework locus polymerase chain reaction amplification primers**

| KIR Locus      | Amplicon                                | KIR SBT PCR primers                       |                                        |           | Position <sup>b</sup> F/R |
|----------------|-----------------------------------------|-------------------------------------------|----------------------------------------|-----------|---------------------------|
|                |                                         | Forward primer                            | Reverse primer                         | Size bp   |                           |
| KIR2DL4        | A2                                      | 2DL4-5UTR-TCCTGGCAGCAGAAGCTGCACC          | 2DL4-SSPR-GGAAAGAGCCGAAGCATC           | 2564      | 5UTR/G581                 |
|                | A <sup>a</sup>                          | 2DL4-E1 (23-40)--CACCCACGGTCATCATCC       | 2DL4-PCR-i6R-N1--CCCTTTCCTGTTGGAGTGT   | 5378      | 28C/in6                   |
|                | B <sup>a</sup>                          | 2DL4-E6F2--CATGTTCTAGGAAACCCTTCT          | 2DL4-I9R2(3UTR)--TGGGCTAAGCAAAGGAGTGT  | 5420      | 666T/3UTR                 |
| KIR3DL2        | A2                                      | 3DL2-5UTR-TGTCTGCACCGGCAGCACC             | 3DL2-SSPR--GACCACACGCAGGGCAG           | 5421      | 5UTR/C898                 |
|                | A <sup>a</sup>                          | 3DL2-E1F--GTCGTCAGCATGGCGTGC              | 3DL2-i6R--TGCATCCAAGGCTTCCACC          | 8706      | 30C/in6                   |
|                | B <sup>a</sup>                          | 3DL2-i5F--TCACATCTCTCCTGTCCCG             | 3DL2-E9R--GGCTGTTGTCTCCCTAGAAA         | 7693      | i5F/T1362                 |
| KIR3DL3        | A2                                      | 3DL3-5UTR-TGTCTGCACCGGCAGCACC             | 3DL3-SSPR--CCGACAACCTCATAGGGTA         | 33614     | 5UTR/T605                 |
|                | A <sup>a</sup>                          | 3DL3-E2 (i1-49)F--TTCCAGGGTTCTTCTTGCTGG   | 3DL3-E5R-143--TGACCCTCAGCACYGCAGT      | 4415      | 49G/A817                  |
|                |                                         |                                           | 3DL3-E5(975-I5)R--CTCACCTGTGACAGAAACGG | 552       | 49G/C935                  |
| B <sup>a</sup> | 3DL3-E5(778-796)F--CCCGGAGCTTGTTTGACATT | 3DL3-E9 (1350-71)R--AGAAGACAACCTTGGATCTGC | 6569                                   | 756T/3UTR |                           |

<sup>a</sup> Sequence of primer pairs previously reported (Gedil et al. 2005;Gedil et al. 2007;Hou et al. 2007;Shulse et al. 2007).

<sup>b</sup> Nucleotide 1 is the first nucleotide of exon 1 based on the sequence of *2DL4*, *3DL2*, and *3DL3* full length genomic DNA.

**Supplementary Table 2. Sequencing primers used for framework genes.**

| <b>KIR Locus</b> | <b>Primer</b> | <b>Sequence (5'-3')</b> | <b>Strand</b>       | <b>Nucleotide Position<sup>a</sup></b> | <b>Sequence Covers Exon</b> |
|------------------|---------------|-------------------------|---------------------|----------------------------------------|-----------------------------|
| <b>2DL4</b>      | 2DL4-SEQ-E1R  | CATCCTCACCACTCACTTGC    | Antisense           | 126-145                                | Exon 1                      |
|                  | 2DL4-SEQ-E2F  | GGCTCAGGAGGAAAGGGTAG    | Sense               | 177-196                                | Exon 2                      |
|                  | 2DL4-SEQ-E2R  | CAGGCCTTCCCATGGTCAG     | Antisense           | 374-392                                | Exon 2                      |
|                  | 2DL4-SEQ-E3F  | GGGGAGAATCTTCTGAGCAC    | Sense               | 1063-1082                              | Exon 3                      |
|                  | 2DL4-SEQ-E3R  | CACCAGAAGCTCTGGGACTC    | Antisense           | 1469-1488                              | Exon 3                      |
|                  | 2DL4-SEQ-E5F  | AGAGCAGGGCAGTGAGTTCT    | Sense               | 2217-2236                              | Exon 5                      |
|                  | 2DL4-SEQ-E5R  | TCCACATCTGTCCATGCTTC    | Antisense           | 2677-2696                              | Exon 5                      |
|                  | 2DL4-SEQ-E6F  | CCAGGGCCCAACATTAGATA    | Sense               | 5074-5093                              | Exon 6                      |
|                  | 2DL4-SEQ-E6R  | ATCACAGAGCTGGCAGGTG     | Antisense           | 5316-5334                              | Exon 6                      |
|                  | 2DL4-SEQ-E7F  | CCTGGCAACCAAGAAATGAG    | Sense               | 9400-9419                              | Exon 7                      |
|                  | 2DL4-SEQ-E7R  | AGACTTTCCTGCCAGTGAGG    | Antisense           | 9663-9682                              | Exon 7                      |
|                  | 2DL4-SEQ-E89F | CCCCCTGTGTGTTGGTATCT    | Sense               | 9965-9984                              | Exons 8,9                   |
|                  | 2DL4-SEQ-E89R | TAAGCAAGAGACAGGCACCA    | Antisense           | 10519-10538                            | Exons 8, 9                  |
|                  | <b>3DL2</b>   | 3DL2-SEQ-E1R            | CGAGATCTCCATCCCCACT | Antisense                              | 66-84                       |
| 3DL2-SEQ-E2F     |               | AGTTTACCTTCAGCCCAGCA    | Sense               | 631-650                                | Exon 2                      |
| 3DL2-SEQ-E2R     |               | GAGACTCCCCGACAGGACTT    | Antisense           | 848-867                                | Exon 2                      |
| 3DL2-SEQ-E3F     |               | AGCGGAAATGGGAGAATCTT    | Sense               | 1436-1455                              | Exon 3                      |
| 3DL2-SEQ-E3R     |               | CAGAAGCTCTGGGATTCAGG    | Antisense           | 1847-1866                              | Exon 3                      |
| 3DL2-SEQ-E4F     |               | ACCCTCACTCATTCCAGGTG    | Sense               | 3196-3215                              | Exon 4                      |
| 3DL2-SEQ-E4R     |               | TCTGTGTCCCAATGACAATGA   | Antisense           | 3595-3615                              | Exon 4                      |
| 3DL2-SEQ-E5F     |               | CTCAGGTATGAGGGGAGCTG    | Sense               | 5078-5097                              | Exon 5                      |
| 3DL2-SEQ-E5R     |               | TCTGCATCTGTCCATGCTTC    | Antisense           | 5515-5534                              | Exon 5                      |
| 3DL2-SEQ-E6F     |               | AGGGTCCAACATTAGATAACA   | Sense               | 8492-8512                              | Exon 6                      |

|                         |               |                        |           |             |            |
|-------------------------|---------------|------------------------|-----------|-------------|------------|
|                         | 3DL2-SEQ-E6R  | CCAGGTTTCCAAAAGCAGAG   | Antisense | 8677-8696   | Exon 6     |
|                         | 3DL2-SEQ-E7F  | GTCAATCAAGAAATGAGACAA  | Sense     | 15253-15273 | Exon 7     |
|                         | 3DL2-SEQ-E7R  | GCAATGGTCTGTGAGCTGAA   | Antisense | 15598-15617 | Exon 7     |
|                         | 3DL2-SEQ-E89F | TGAAATGAGGACCCAGAAGG   | Sense     | 15837-15856 | Exons 8, 9 |
|                         | 3DL2-SEQ-E89R | AACCCCTCAAGACCTGACT    | Antisense | 16231-16250 | Exons 8, 9 |
| <b>3DL3<sup>b</sup></b> | 3DL3-SEQ-E1R  | CTCGATTCCCTCCAGGACT    | Antisense | 38-57       | Exon 1     |
|                         | 3DL3-SEQ-E2F  | GAGATGTTGGCTTGGAGTGC   | Sense     | 442-461     | Exon 2     |
|                         | 3DL3-SEQ-E2R  | ATCAGTCAACCCCTGTGTC    | Antisense | 820-839     | Exon 2     |
|                         | 3DL3-SEQ-E3F  | AGAAACGTGGAAATGGGAGA   | Sense     | 1426-1445   | Exon 3     |
|                         | 3DL3-SEQ-E3R  | GAGGTGGACAGTGAGAAGC    | Antisense | 1823-1842   | Exon 3     |
|                         | 3DL3-SEQ-E4F  | TAGACACCATGGAGGGGAAG   | Sense     | 2982-3001   | Exon 4     |
|                         | 3DL3-SEQ-E4R  | AAGTCCTRGATCATTCACTC   | Antisense | 3418-3437   | Exon 4     |
|                         | 3DL3-SEQ-E5F  | AGCTCAGGTGTGAGGAGAGC   | Sense     | 4890-4909   | Exon 5     |
|                         | 3DL3-SEQ-E5R  | TGAGCCTAAGTTCACCGGC    | Antisense | 5083-5101   | Exon 5     |
|                         | 3DL3-SEQ-E5F2 | ATCTATCCAGGGAGGCAGAG   | Sense     | 5063-5082   | Exon 5     |
|                         | 3DL3-SEQ-E5R2 | TGGCTCTAGGATCACAAGACA  | Antisense | 5277-5297   | Exon 5     |
|                         | 3DL3-SEQ-E7F  | CTCCTTGGGACAGCATTGAT   | Sense     | 10395-10414 | Exon 7     |
|                         | 3DL3-SEQ-E7R  | AGAAAGTCCTGCCTCTGTGG   | Antisense | 10938-10957 | Exon 7     |
|                         | 3DL3-SEQ-E89F | AAATGAGGACCCAGAAGTGC   | Sense     | 11231-11250 | Exons 8, 9 |
|                         | 3DL3-SEQ-E89R | CAGCATTTGGAAGTTCCGTGTT | Antisense | 11562-11583 | Exons 8, 9 |

<sup>a</sup> Nucleotide 1 is the first nucleotide of exon 1 based on the sequence of *KIR2DL4*, *KIR3DL2*, and *KIR3DL3* full length genomic DNA.

<sup>b</sup> *KIR3DL3* primers have previously been described (Hou et al. 2007).

### AFAm Framework Genes-SBT Strategy

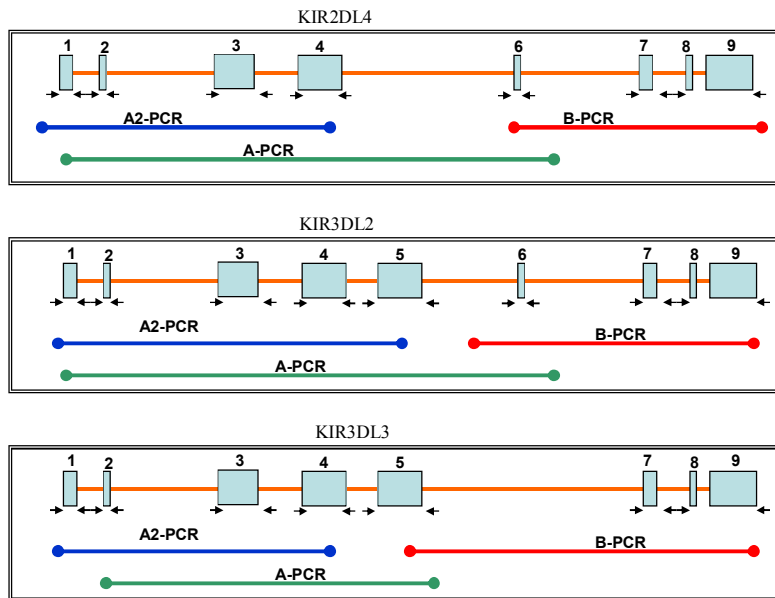

Supplemental Figure 1









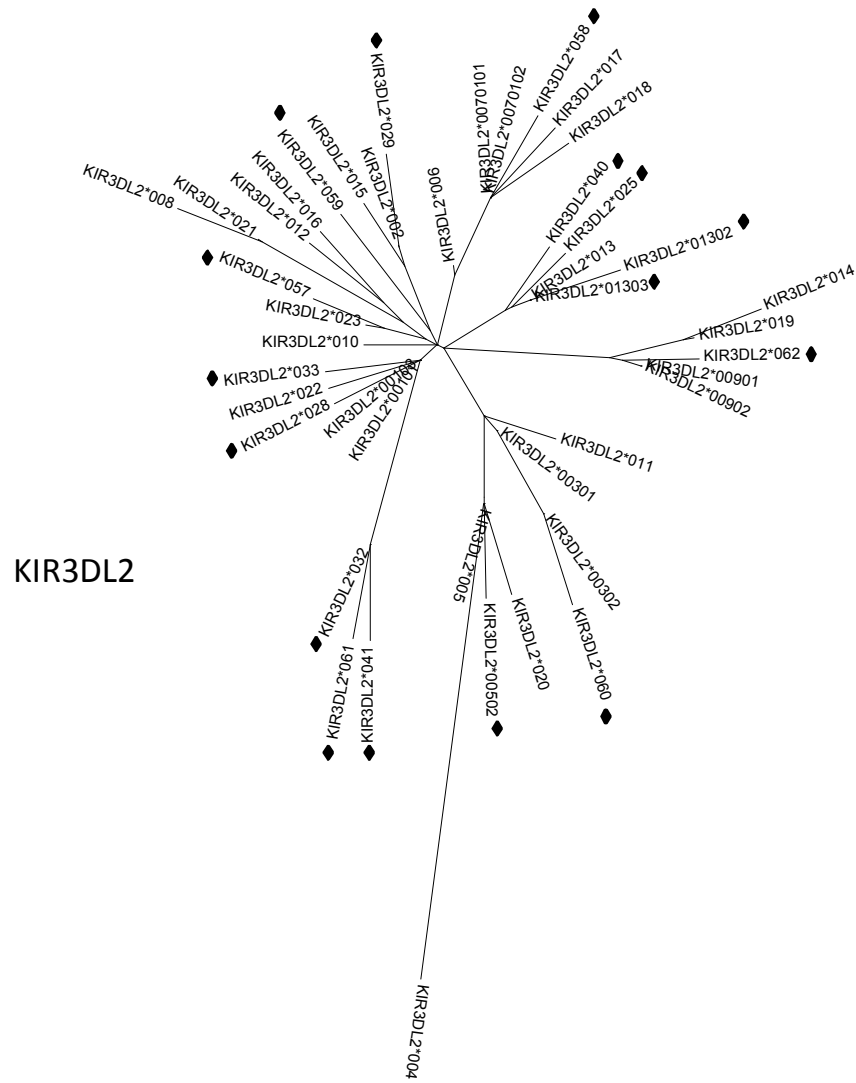

Supplemental Figure 4
